# Supplementary material for: Altered Serum MicroRNA Profile May Serve as an Auxiliary Tool for Discriminating Aggressive Thyroid Carcinoma from Nonaggressive Thyroid Cancer and Benign Thyroid Nodules
Source: PubMed Central journal article supplement (PMC6766139; doi:10.1155/2019/3717683), 2019-09-16
Supplement: 3717683.f1.pdf [file 3717683.f1.pdf]

# 1 Supplementary Materials

2 **Table S1** | Dysregulated miRNAs in pooled serum samples from the PTC, benign nodule and the healthy control  
 3 groups determined by TLDA.

| miRNA       | PTC<br>( $\Delta$ CT) <sup>a</sup> | Benign<br>nodule<br>( $\Delta$ CT) <sup>a</sup> | Healthy<br>control<br>( $\Delta$ CT) <sup>a</sup> | Fold change <sup>b</sup><br>(PTC vs Healthy<br>controls) | Fold change <sup>c</sup><br>(PTC vs Benign<br>nodule) |
|-------------|------------------------------------|-------------------------------------------------|---------------------------------------------------|----------------------------------------------------------|-------------------------------------------------------|
| miR-140-5p  | 5.7458230                          | 11.96381                                        | 21.488104                                         | 54814.91957                                              | 74.439012                                             |
| miR-374b-5p | 7.7001343                          | 21.555685                                       | 21.488104                                         | 14144.65825                                              | 14823.00882                                           |
| miR-15b-5p  | 7.9054585                          | 21.555685                                       | 21.488104                                         | 12268.28103                                              | 12856.64417                                           |
| miR-664-3p  | 8.853712                           | 21.685385                                       | 21.89232                                          | 8414.18603                                               | 7289.84791                                            |
| miR-22-3p   | 8.714579                           | 21.555685                                       | 21.488104                                         | 7001.87213                                               | 7337.66843                                            |
| miR-28-5p   | 9.310087                           | 21.555685                                       | 21.488104                                         | 4633.91864                                               | 4856.15246                                            |
| miR-148a-3p | 9.566719                           | 21.555685                                       | 21.488104                                         | 3878.77399                                               | 4064.79252                                            |
| miR-132-3p  | 6.2873898                          | 10.835986                                       | 17.29107                                          | 2053.23095                                               | 23.40259                                              |
| miR-93-5p   | 3.0036297                          | 6.2375793                                       | 11.464775                                         | 352.41837                                                | 9.40840                                               |
| miR-19b-3p  | 0.9770184                          | 7.188507                                        | 8.98852                                           | 258.04907                                                | 74.10447                                              |
| miR-19a-3p  | 7.697296                           | 14.396744                                       | 15.490163                                         | 221.76179                                                | 103.92853                                             |
| miR-26a-5p  | 7.285074                           | 12.263776                                       | 14.78407                                          | 180.89340                                                | 31.53107                                              |
| miR-20b-5p  | 4.847439                           | 8.976614                                        | 12.280873                                         | 172.85685                                                | 17.49869                                              |
| miR-223-5p  | 5.6076183                          | 11.732357                                       | 12.981915                                         | 165.91456                                                | 69.77986                                              |
| miR-451a    | 2.055975                           | 6.1466846                                       | 9.41103                                           | 163.71640                                                | 17.03830                                              |
| miR-199a-3p | 7.461588                           | 13.192363                                       | 14.675967                                         | 148.50616                                                | 53.10497                                              |
| miR-17-5p   | 0.4355450                          | 3.3007717                                       | 7.5077343                                         | 134.56779                                                | 7.28650                                               |
| miR-30a-3p  | 5.4614906                          | 13.609775                                       | 12.348399                                         | 118.34939                                                | 283.71220                                             |
| miR-24-3p   | -0.0267582                         | 4.0160027                                       | 6.7012825                                         | 106.00883                                                | 16.48133                                              |
| miR-628-3p  | 8.611599                           | 21.685385                                       | 15.133647                                         | 91.90351                                                 | 8621.87541                                            |
| miR-151a-5p | 8.314804                           | 14.14999                                        | 14.826596                                         | 91.25249                                                 | 57.09079                                              |
| miR-126-3p  | 1.3874226                          | 4.389454                                        | 7.3859043                                         | 63.93268                                                 | 8.01127                                               |
| miR-146b-5p | 3.2094193                          | 6.5567627                                       | 8.940588                                          | 53.11946                                                 | 10.17773                                              |
| miR-26b-3p  | 7.5953484                          | 12.498836                                       | 13.26855                                          | 51.02745                                                 | 29.92932                                              |
| miR-195-5p  | 5.048443                           | 11.53008                                        | 10.681157                                         | 49.61533                                                 | 89.36494                                              |
| miR-183-3p  | 9.590357                           | 21.685385                                       | 14.904515                                         | 39.78515                                                 | 4374.88082                                            |
| miR-186-5p  | 1.8360672                          | 5.710184                                        | 6.81583                                           | 31.55426                                                 | 14.66309                                              |
| miR-200c-3p | 9.367243                           | 16.817154                                       | 14.290509                                         | 30.34246                                                 | 174.84237                                             |
| miR-16-5p   | -1.3614216                         | 4.176815                                        | 3.241455                                          | 24.29987                                                 | 46.47029                                              |
| miR-146a-5p | -1.0971565                         | 1.3083973                                       | 3.4137611                                         | 22.79930                                                 | 5.29839                                               |
| miR-222-3p  | -0.9773254                         | 1.6525078                                       | 3.1795883                                         | 17.83839                                                 | 6.18954                                               |

4 <sup>a</sup>  $\Delta$ CT=CT<sup>miRNA</sup>-CT<sup>internal control</sup>

5 <sup>b</sup> Fold change=2<sup>-[ $\Delta$ CT(PTC miRNA)- $\Delta$ CT(healthy control miRNA)]</sup>

6 <sup>c</sup> Fold change=2<sup>-[ $\Delta$ CT(PTC miRNA)- $\Delta$ CT(benign nodule miRNA)]</sup>

7

1  
2

**Table S2** | Differentially expressed miRNAs among the PTC, benign nodule and the healthy control groups in the training set by qRT-PCR<sup>1</sup>

| miRNA       | PTC<br>n=36     | Benign nodule<br>n=36 | Healthy control<br>n=32 | <i>p</i> -value <sup>2</sup> | <i>p</i> -value <sup>3</sup> | <i>p</i> -value <sup>4</sup> |
|-------------|-----------------|-----------------------|-------------------------|------------------------------|------------------------------|------------------------------|
| miR-222-3p  | 0.3364 ± 0.0436 | 0.2709 ± 0.0301       | 0.1889 ± 0.0155         | <b>0.2207</b>                | 0.0034**                     | 0.0225*                      |
| miR-17-5p   | 1.2620 ± 0.1858 | 1.0810 ± 0.0554       | 0.7718 ± 0.0480         | <b>0.3537</b>                | 0.0182*                      | 0.0001***                    |
| miR-451a    | 1.6690 ± 0.1950 | 1.6080 ± 0.2007       | 0.8249 ± 0.0493         | <b>0.8293</b>                | 0.0002***                    | 0.0006***                    |
| miR-140-5p  | 0.3620 ± 0.0320 | 0.3463 ± 0.0341       | 0.3436 ± 0.0289         | <b>0.7387</b>                | 0.6740                       | 0.9516                       |
| miR-374b-5p | 0.1878 ± 0.0071 | 0.1926 ± 0.0036       | 0.2008 ± 0.0044         | <b>0.5566</b>                | 0.1522                       | 0.1553                       |
| miR-15b-5p  | 0.0491 ± 0.0041 | 0.0508 ± 0.0043       | 0.0492 ± 0.0026         | <b>0.7757</b>                | 0.9751                       | 0.7603                       |
| miR-664-3p  | 5.0540 ± 0.2458 | 5.0470 ± 0.2550       | 4.615 ± 0.1709          | <b>0.9845</b>                | 0.1437                       | 0.1594                       |
| miR-22-3p   | 0.1188 ± 0.0086 | 0.1131 ± 0.0060       | 0.1278 ± 0.0059         | <b>0.5854</b>                | 0.3971                       | 0.0858                       |
| miR-28-5p   | 0.0181 ± 0.0010 | 0.0179 ± 0.0011       | 0.0175 ± 0.0006         | <b>0.8518</b>                | 0.5875                       | 0.7584                       |
| miR-148a-3p | 0.1362 ± 0.0080 | 0.1403 ± 0.0104       | 0.1590 ± 0.0084         | <b>0.7587</b>                | 0.0558                       | 0.1669                       |
| miR-132-3p  | 1.2020 ± 0.0461 | 1.1750 ± 0.0572       | 1.6880 ± 0.0645         | <b>0.7146</b>                | 0.0001***                    | 0.0001***                    |
| miR-93-5p   | 0.3828 ± 0.0218 | 0.3998 ± 0.0261       | 0.3465 ± 0.0192         | <b>0.6192</b>                | 0.2209                       | 0.1107                       |
| miR-19a-3p  | 0.0815 ± 0.0033 | 0.0800 ± 0.0031       | 0.0807 ± 0.0022         | <b>0.7475</b>                | 0.8332                       | 0.8661                       |
| miR-26a-5p  | 1.0340 ± 0.0984 | 1.1240 ± 0.1448       | 0.8233 ± 0.0525         | <b>0.6114</b>                | 0.0723                       | 0.0672                       |
| miR-20b-5p  | 0.3311 ± 0.0139 | 0.3330 ± 0.0165       | 0.3343 ± 0.0134         | <b>0.9313</b>                | 0.8721                       | 0.9531                       |
| miR-223-5p  | 0.1619 ± 0.0077 | 0.1557 ± 0.0071       | 0.1566 ± 0.0072         | <b>0.5537</b>                | 0.6140                       | 0.9285                       |
| miR-199a-3p | 0.1887 ± 0.0125 | 0.1933 ± 0.0141       | 0.1945 ± 0.0102         | <b>0.8058</b>                | 0.7178                       | 0.9453                       |
| miR-30a-3p  | 0.5273 ± 0.0559 | 0.4944 ± 0.0292       | 0.4933 ± 0.0269         | <b>0.6087</b>                | 0.5859                       | 0.9777                       |
| miR-24-3p   | 0.3141 ± 0.0191 | 0.2997 ± 0.0176       | 0.3190 ± 0.0213         | <b>0.5816</b>                | 0.8632                       | 0.4828                       |
| miR-628-3p  | 0.1418 ± 0.0183 | 0.1305 ± 0.0180       | 0.1744 ± 0.0262         | <b>0.6595</b>                | 0.3136                       | 0.1732                       |
| miR-126-3p  | 1.0890 ± 0.0928 | 1.1160 ± 0.1493       | 0.8840 ± 0.0928         | <b>0.8909</b>                | 0.1880                       | 0.1930                       |
| miR-146b-5p | 2.6900 ± 0.1887 | 2.4720 ± 0.1303       | 2.7170 ± 0.1286         | <b>0.3449</b>                | 0.9088                       | 0.1872                       |
| miR-26b-3p  | 0.4883 ± 0.0237 | 0.4882 ± 0.0239       | 0.4451 ± 0.0193         | <b>0.9985</b>                | 0.1620                       | 0.1658                       |
| miR-195-5p  | 0.1894 ± 0.0106 | 0.1884 ± 0.0087       | 0.1804 ± 0.0083         | <b>0.9440</b>                | 0.5162                       | 0.5125                       |
| miR-183-3p  | 0.5777 ± 0.0393 | 0.5242 ± 0.0304       | 0.7800 ± 0.0299         | <b>0.2856</b>                | 0.0002***                    | 0.0001***                    |
| miR-186-5p  | 0.8651 ± 0.0487 | 0.9168 ± 0.0344       | 0.9060 ± 0.0241         | <b>0.3904</b>                | 0.4553                       | 0.7984                       |
| miR-200c-3p | 0.0260 ± 0.0019 | 0.0251 ± 0.0018       | 0.0244 ± 0.0012         | <b>0.7317</b>                | 0.4668                       | 0.7253                       |
| miR-16-5p   | 0.0845 ± 0.0048 | 0.0785 ± 0.0067       | 0.0727 ± 0.0041         | <b>0.4671</b>                | 0.0674                       | 0.4671                       |
| miR-146a-5p | 1.3920 ± 0.0664 | 1.3190 ± 0.0738       | 1.7110 ± 0.0890         | <b>0.4633</b>                | 0.0049**                     | 0.0011**                     |
| miR-151a-5p |                 |                       |                         |                              | Ct > 35                      |                              |
| miR-19b-3p  |                 |                       |                         |                              | Ct > 35                      |                              |

3  
4  
5  
6  
7  
8  
9  
10

<sup>1</sup>The relative contents of miRNAs are presented as mean±SEM.

<sup>2</sup> Difference between the PTC group and the benign nodule group.

<sup>3</sup> Difference between the PTC group and healthy control group.

<sup>4</sup> Difference between the benign nodule group and healthy control group.

<sup>5</sup> \* *p*<0.05; \*\* *p*<0.01; \*\*\* *p*<0.001.

1

**Table S3** | The AUCs of the 6 serum miRNAs and their panel in ROC curves analysis for PTC and controls.

| miRNA             | AUC   | Std. Error <sup>a</sup> | Asymptotic 95% Confidence Interval |             |
|-------------------|-------|-------------------------|------------------------------------|-------------|
|                   |       |                         | Lower Bound                        | Upper Bound |
| <b>miR-222-3p</b> | 0.680 | 0.038                   | 0.604                              | 0.755       |
| <b>miR-17</b>     | 0.665 | 0.039                   | 0.588                              | 0.742       |
| <b>miR-451a</b>   | 0.757 | 0.035                   | 0.688                              | 0.825       |
| <b>miR-146a</b>   | 0.653 | 0.04                    | 0.575                              | 0.732       |
| <b>miR-132</b>    | 0.765 | 0.035                   | 0.696                              | 0.835       |
| <b>miR-183</b>    | 0.752 | 0.036                   | 0.681                              | 0.822       |
| <b>miR-Panel</b>  | 0.772 | 0.035                   | 0.704                              | 0.839       |

2

3

4

5

**Table S4** | Demographic and clinical features of the MTC patients, matched benign nodule patients and healthy control individuals.

| Variables               | MTC<br>n=15 | Benign nodule<br>n=15 | Healthy control<br>n=15 | <i>p</i> <sup>b</sup> | <i>p</i> <sup>c</sup> |
|-------------------------|-------------|-----------------------|-------------------------|-----------------------|-----------------------|
| Age, years <sup>a</sup> | 50.5(10.1)  | 50.4(9.8)             | 50.1(10.3)              | 0.9855 <sup>d</sup>   | 0.9292 <sup>d</sup>   |
| <b>Sex, No.</b>         |             |                       |                         |                       |                       |
| Male                    | 7(47%)      | 7(47%)                | 7(47%)                  | 1 <sup>e</sup>        | 1 <sup>e</sup>        |
| Female                  | 8(53%)      | 8(53%)                | 8(53%)                  |                       |                       |
| <b>LN metastasis, n</b> |             |                       |                         |                       |                       |
| Yes                     | 13(87%)     |                       |                         |                       |                       |
| No                      | 2(13%)      |                       |                         |                       |                       |
| <b>TNM stage, n</b>     |             |                       |                         |                       |                       |
| I/II                    | 13(87%)     |                       |                         |                       |                       |
| III/IV                  | 2(13%)      |                       |                         |                       |                       |

6

<sup>a</sup> Age data are presented as the mean (SD).

7

<sup>b</sup> Difference between PTC group and benign nodule group.

8

<sup>c</sup> Difference between PTC group and healthy control group.

9

<sup>d</sup> Student's *t*-test.

10

<sup>e</sup> Two-sided  $\chi^2$  test.

11

12

13

14

15
